# Supplementary material for: Large Kondo effect in assemblies of Au nanoparticles linked with alkanedithiol electron bridges
Source: Royal Society of Chemistry journal article supplement (doi:10.1039/c8nr09280j), 2019-01-01
Supplement: c8nr09280j1.pdf [file c8nr09280j1.pdf]

Electronic Supplementary Information for:

## Large Kondo Effect in Assemblies of Au Nanoparticles Linked with Alkanedithiol Electron Bridges Nanoscales

Monique Tie<sup>1</sup>, Steven Gravelins<sup>1</sup>, Marek Niewczas<sup>2</sup>, Al-Amin Dhirani<sup>1,3</sup>

1. Department of Chemistry, University of Toronto, Ontario, Canada, M5S 3H6.

2. Department of Materials Science and Engineering, McMaster University, Hamilton, Ontario, Canada, L8S 4L7

3. Department of Physics, University of Toronto, Toronto, Ontario, Canada, M5S 3H6.

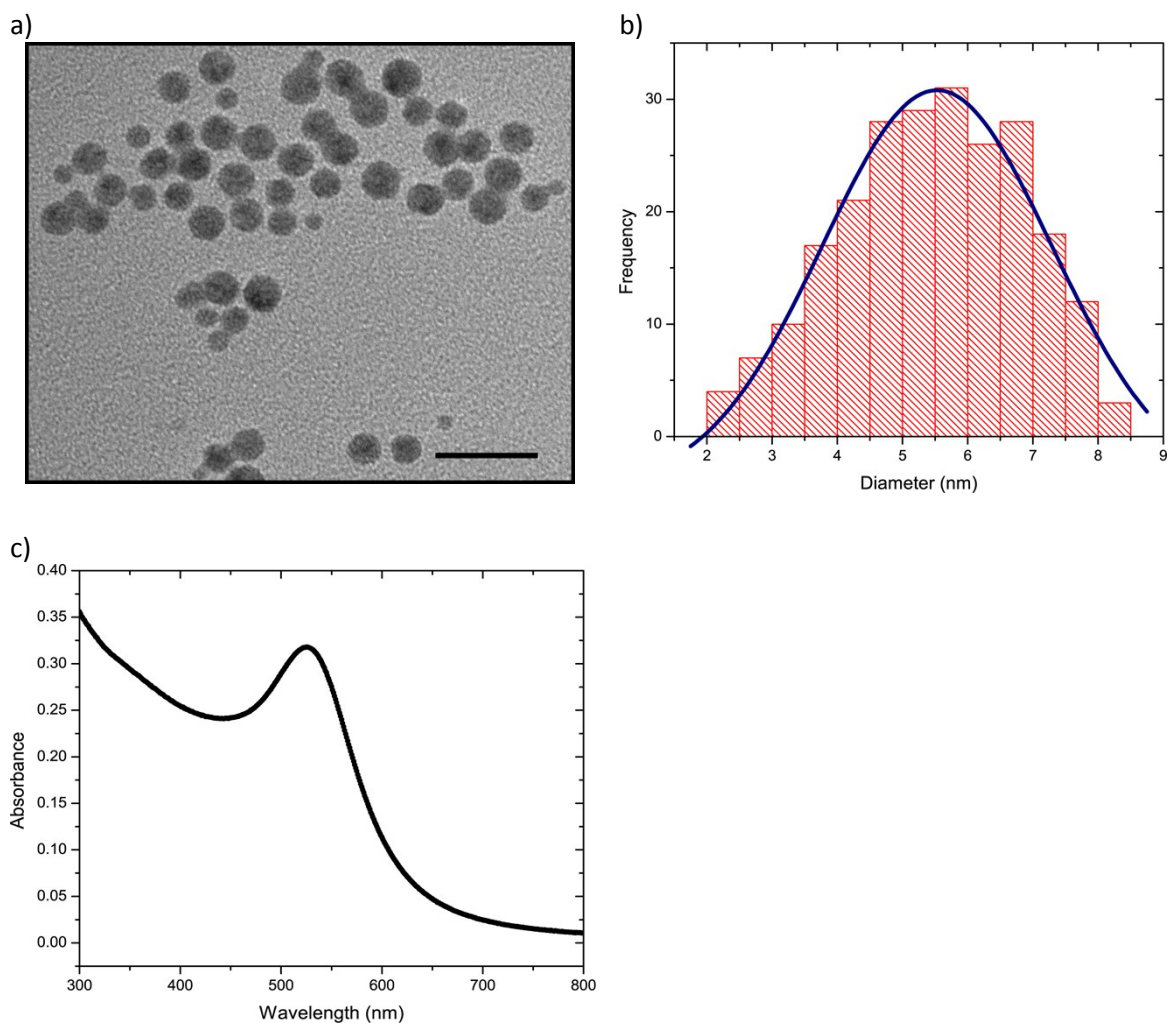

**Fig. S1: Nanoparticle characterization. a) TEM image of nanoparticles. The scale bar corresponds to 20nm. b) Histogram of nanoparticle sizes. The average nanoparticle size is  $5.5 \pm 1.8$  nm. c) UV-Vis absorption spectrum of a nanoparticle solution.**

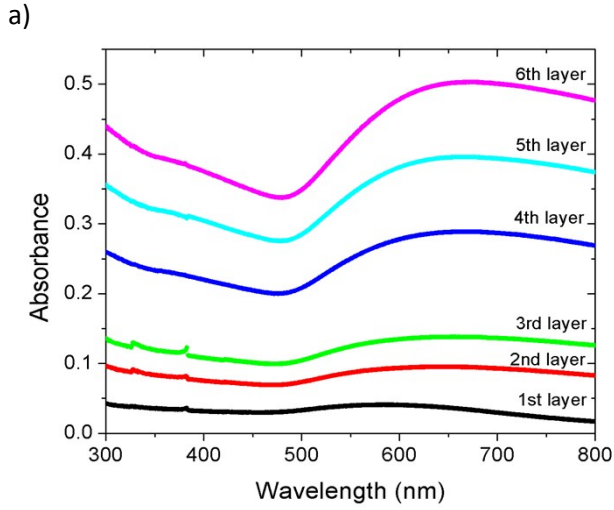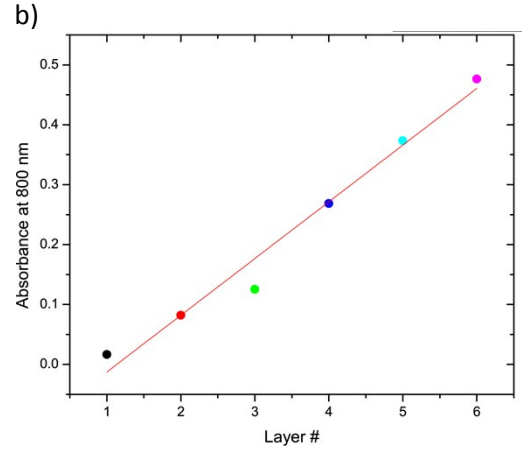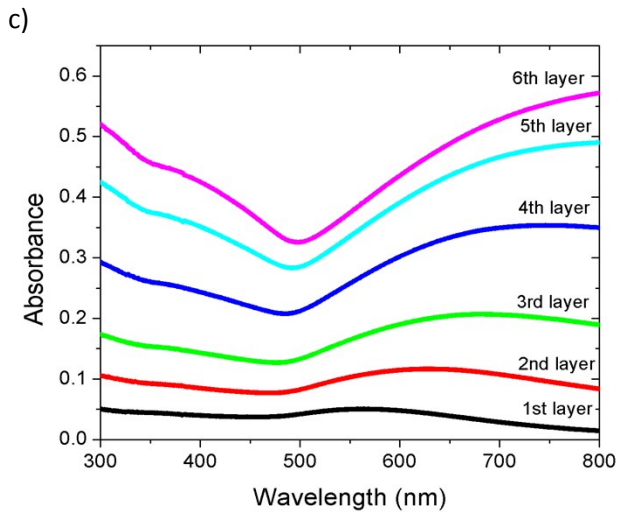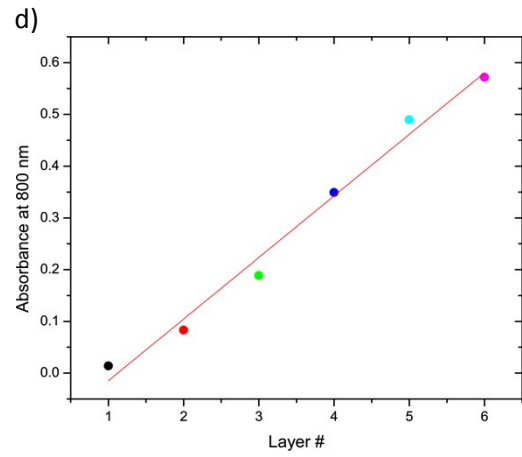

**Fig. S2: UV-Vis absorption spectra and absorption at 800 nm with various number of nanoparticle/linker immersion cycles using 1,4 – butanedithiol (a, b) and 1, 4 butanediamine (c, d).**

a)

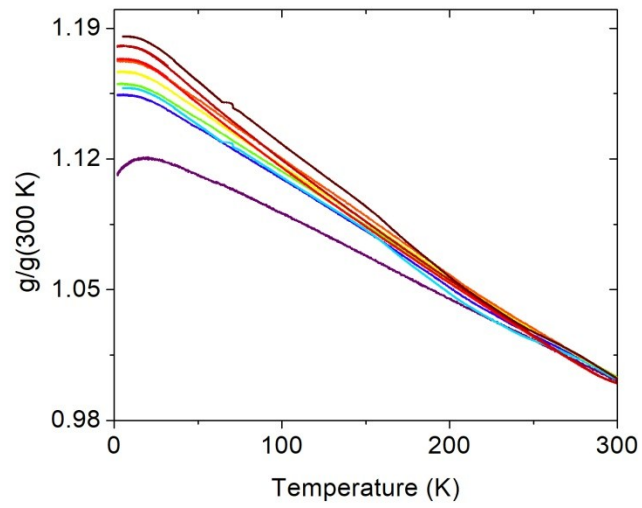

b)

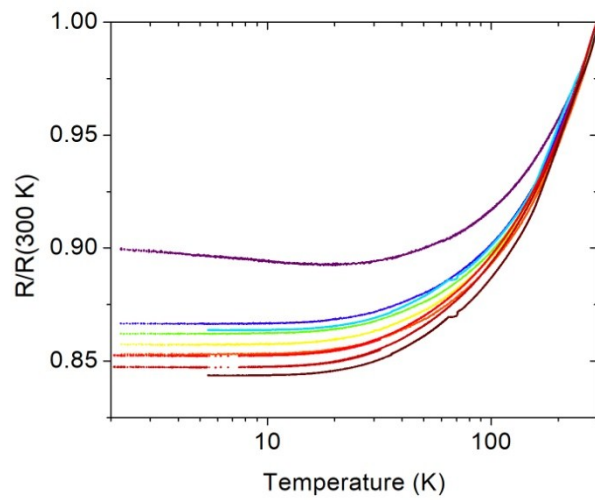

**Fig. S3: a) Conductance vs. temperature and b) resistance vs. temperature on a log scale for metallic butanediamine-linked Au Nanoparticle Films.**
